# Supplementary material for: Magnetic N-containing carbon spheres derived from sustainable chitin for the selective oxidation of C–H bonds
Source: Royal Society of Chemistry journal article supplement (doi:10.1039/c7ra10226g), 2017-01-01
Supplement: c7ra10226g1.pdf [file c7ra10226g1.pdf]

## Magnetic N-containing carbon spheres derived from sustainable chitin for selective oxidation of C-H bonds

Yunrui Zhang,<sup>ab</sup> Haihong Niu,<sup>ab</sup> Xiangjie Zhang,<sup>ab</sup> Junxiu Pan,<sup>ab</sup> Yang Dong,<sup>ab</sup> Haijun Wang<sup>ab</sup> and  
Yongjun Gao\*<sup>ab</sup>

*a* Key Laboratory of Chemical Biology of Hebei Province, College of Chemistry and Environmental Science,  
Hebei University, Hebei University, Baoding 071002, China.

*b* Key Laboratory of Medicinal Chemistry and Molecular Diagnosis of Ministry of Education, College of Chemistry  
and Environmental Science, Hebei University, Hebei University, Baoding 071002, China.

Email: yjgao@hbu.edu.cn

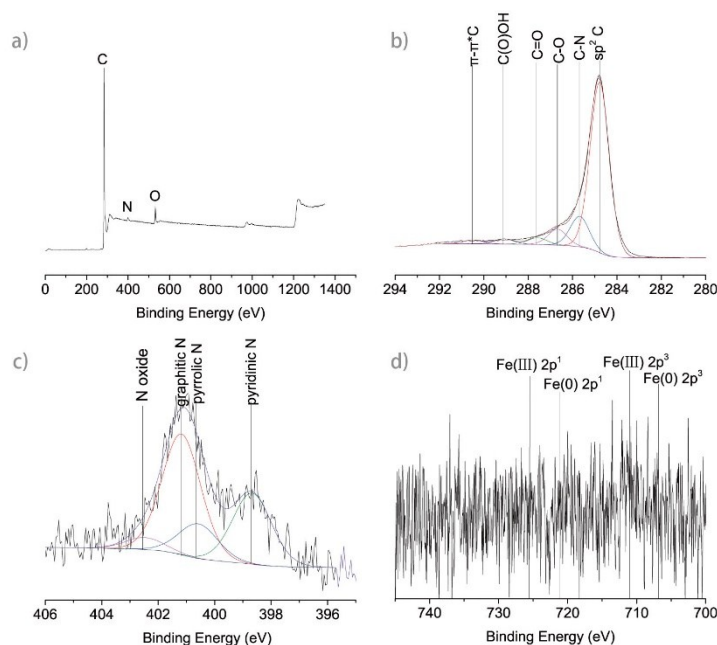

**Figure S1.** XPS full spectra, C 1S spectra, N 1S spectra, Fe2p spectra of the Fe@NC800 after hydrochloric washing.

The catalyst Fe@NC ( 10 mg ) was boiled in 3 mL CH<sub>2</sub>Cl<sub>2</sub> for five hours and then filtered out. The filtrate was used as solvent to conduct the next blank reaction. The detailed reaction conditions were as following: trans-stilbene 1 mmol, filtrated CH<sub>2</sub>Cl<sub>2</sub> 2 mL, urea 0.5 mmol, 373K.

**Table S1** The catalytic performance of the filtrate of Fe@NC dispersion.

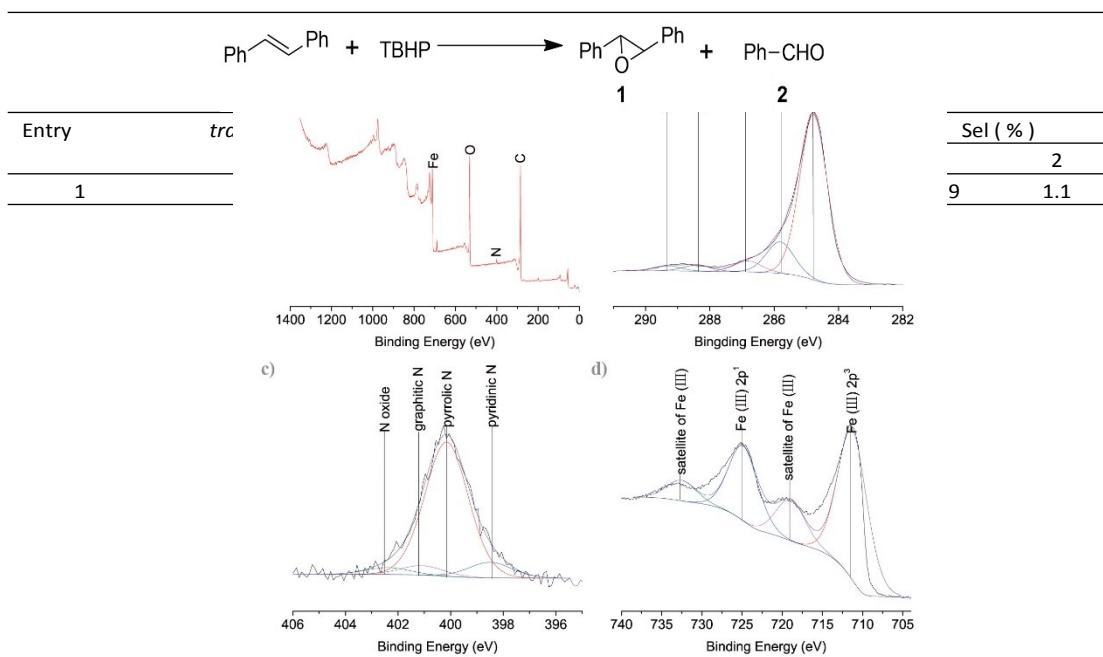

**Figure S2.** XPS full spectra, C 1S spectra, N 1S spectra, Fe2p spectra of the Fe@NC800 after the reaction.

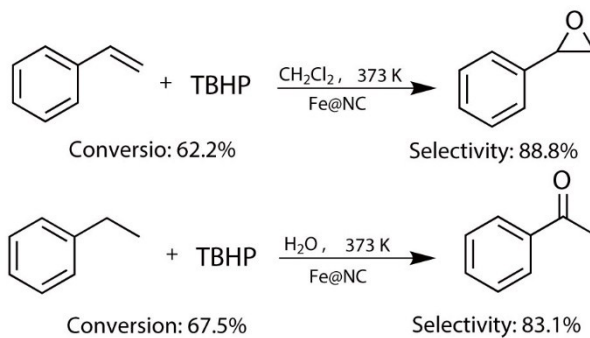

**Figure S3.** The oxidation results of styrene and ethylbenzene with Fe@NC as catalyst.
